# Supplementary material for: A fine-tuned vector-parasite dialogue in tsetse's cardia determines peritrophic matrix integrity and trypanosome transmission success
Source: PLoS Pathog. 2018 Apr 3;14(4):e1006972. doi: 10.1371/journal.ppat.1006972 (PMC5898766; doi:10.1371/journal.ppat.1006972)
Supplement: S3 Dataset — (XLSX) [file ppat.1006972.s012.xlsx]

## Sheet: Non-Permissive Up
GO terms upregulated only in inf+/- cardia phenotype
GO ID	Go term	Category	FDR corrected p-value	P-value	#Genes DE	#Genes non-DE
Immune response
GO:0043207	response to external biotic stimulus	P	0.00129	5.12e-07	27	137
GO:0051707	response to other organism	P	0.00129	5.12e-07	27	137
GO:0009607	response to biotic stimulus	P	0.00129	5.8e-07	27	138
GO:0098542	defense response to other organism	P	0.00658	9.49e-06	19	89
GO:0042742	defense response to bacterium	P	0.0243	4.38e-05	13	50
GO:0019730	antimicrobial humoral response	P	0.0263	5.21e-05	13	51
GO:0006959	humoral immune response	P	0.0338	7.3e-05	13	53
GO:0006955	immune response	P	0.0343	7.73e-05	23	145
GO:0002376	immune system process	P	0.0396	9.28e-05	37	301
GO:0006952	defense response	P	0.0473	0.000117	26	181
GO:0019731	antibacterial humoral response	P	0.0473	0.00012	8	20
Transport
GO:0005215	transporter activity	F	0.00283	2.28e-06	62	536
Peptidase
GO:0008238	exopeptidase activity	F	0.0497	0.00013	14	65

## Sheet: Non-permissive Down
GO terms downregulated only in inf+/- cardia phenotype
GO ID	Go term	Category	FDR corrected p-value	P-value	#Genes DE	#Genes non-DE
Amino acids metabolism
GO:0009063	cellular amino acid catabolic process	P	1.86892e-05	2.35911e-08	16	40
GO:0009081	branched-chain amino acid metabolic process	P	7.93518e-05	1.35938e-07	7	3
GO:0009083	branched-chain amino acid catabolic process	P	9.05419e-05	1.63271e-07	6	1
GO:1901605	alpha-amino acid metabolic process	P	0.000113592	2.35562e-07	22	95
GO:0009069	serine family amino acid metabolic process	P	0.00027579	7.21117e-07	10	17
GO:1901565	organonitrogen compound catabolic process	P	0.00119345	3.44338e-06	20	96
GO:1901606	alpha-amino acid catabolic process	P	0.0012951	3.97019e-06	12	34
GO:0006520	cellular amino acid metabolic process	P	0.00285546	1.00408e-05	29	195
GO:0006544	glycine metabolic process	P	0.00429913	1.70554e-05	6	6
GO:0006563	L-serine metabolic process	P	0.0314169	0.000260603	4	3
GO:0009071	serine family amino acid catabolic process	P	0.0314169	0.000260603	4	3
GO:0008483	transaminase activity	F	0.0200089	0.000149738	7	16
GO:0016769	transferase activity, transferring nitrogenous groups	F	0.0200089	0.000149738	7	16
Carboxylic acid metabolism
GO:0016054	organic acid catabolic process	P	2.70256e-07	1.21836e-10	22	58
GO:0046395	carboxylic acid catabolic process	P	2.70256e-07	1.21836e-10	22	58
GO:0019752	carboxylic acid metabolic process	P	5.79006e-07	3.58791e-10	56	371
GO:0006082	organic acid metabolic process	P	5.79006e-07	3.65435e-10	58	393
GO:0044282	small molecule catabolic process	P	8.25571e-07	5.95489e-10	24	78
GO:0043436	oxoacid metabolic process	P	1.07165e-06	8.69607e-10	57	392
GO:0044711	single-organism biosynthetic process	P	1.86892e-05	2.23258e-08	63	504
GO:0044283	small molecule biosynthetic process	P	2.3116e-05	3.12632e-08	28	133
GO:0044712	single-organism catabolic process	P	0.000113592	2.3126e-07	36	228
GO:0016885	ligase activity, forming carbon-carbon bonds	F	0.000246842	6.2317e-07	6	2
GO:0031406	carboxylic acid binding	F	0.00728648	3.39508e-05	9	23
GO:0043177	organic acid binding	F	0.00728648	3.39508e-05	9	23
GO:0032787	monocarboxylic acid metabolic process	P	0.00933552	5.21866e-05	22	139
GO:0072329	monocarboxylic acid catabolic process	P	0.0239886	0.000181683	8	23
GO:0016053	organic acid biosynthetic process	P	0.024617	0.000190881	14	72
GO:0046394	carboxylic acid biosynthetic process	P	0.024617	0.000190881	14	72
GO:0046912	transferase activity, transferring acyl groups, acyl groups converted into alkyl on transfer	F	0.01471	9.15148e-05	5	5
Energy production
GO:0016616	oxidoreductase activity, acting on the CH-OH group of donors, NAD or NADP as acceptor	F	0.00959981	5.52717e-05	14	63
GO:0009055	electron carrier activity	F	0.0062642	2.5416e-05	16	75
GO:0006091	generation of precursor metabolites and energy	P	0.0114692	6.92845e-05	22	142
GO:0015980	energy derivation by oxidation of organic compounds	P	0.0314169	0.000258451	15	84
Carbohydrates metabolism
GO:0046364	monosaccharide biosynthetic process	P	0.0037031	1.40231e-05	9	20
GO:0006094	gluconeogenesis	P	0.0042756	1.65766e-05	8	15
GO:0019319	hexose biosynthetic process	P	0.00728648	3.32139e-05	8	17
GO:0006006	glucose metabolic process	P	0.0173097	0.000112966	10	35
Nucleic acid metabolism
GO:0009152	purine ribonucleotide biosynthetic process	P	0.00728648	3.36167e-05	16	77
GO:0009156	ribonucleoside monophosphate biosynthetic process	P	0.00750262	3.58524e-05	13	52
GO:0055086	nucleobase-containing small molecule metabolic process	P	0.00864674	4.36586e-05	33	259
GO:0072522	purine-containing compound biosynthetic process	P	0.00912012	4.89633e-05	17	89
GO:0009124	nucleoside monophosphate biosynthetic process	P	0.00912012	5.01603e-05	13	54
GO:0006164	purine nucleotide biosynthetic process	P	0.0109462	6.51383e-05	16	82
GO:0072521	purine-containing compound metabolic process	P	0.0131027	8.03338e-05	25	176
GO:0009150	purine ribonucleotide metabolic process	P	0.0173097	0.000119118	22	148
GO:0009260	ribonucleotide biosynthetic process	P	0.0173097	0.000120174	16	87
GO:0046390	ribose phosphate biosynthetic process	P	0.0173097	0.000120174	16	87
GO:1901293	nucleoside phosphate biosynthetic process	P	0.0191502	0.000137425	19	118
GO:0009165	nucleotide biosynthetic process	P	0.0191502	0.000137425	19	118
GO:0009126	purine nucleoside monophosphate metabolic process	P	0.0191502	0.000139858	18	108
GO:0009167	purine ribonucleoside monophosphate metabolic process	P	0.0191502	0.000139858	18	108
GO:0006163	purine nucleotide metabolic process	P	0.0323962	0.000274569	22	158
GO:0019693	ribose phosphate metabolic process	P	0.0367202	0.000314527	23	171
GO:0009117	nucleotide metabolic process	P	0.0377612	0.000326848	28	230
GO:0009161	ribonucleoside monophosphate metabolic process	P	0.0385311	0.000336986	18	117
GO:0009259	ribonucleotide metabolic process	P	0.0424565	0.000375145	22	162
GO:0009123	nucleoside monophosphate metabolic process	P	0.0453155	0.000404493	18	119
GO:0006753	nucleoside phosphate metabolic process	P	0.0466472	0.000420586	28	234
Cytoplasm structure
GO:0015629	actin cytoskeleton	C	0.00129387	3.84977e-06	19	88
GO:0019866	organelle inner membrane	C	0.00912012	4.895e-05	20	118
Co-factors and vitamins
GO:0048037	cofactor binding	F	6.28833e-05	9.63859e-08	30	160
GO:0004075	biotin carboxylase activity	F	0.00819466	4.06371e-05	4	1
GO:0016421	CoA carboxylase activity	F	0.00819466	4.06371e-05	4	1
GO:0050662	coenzyme binding	F	0.00912012	4.895e-05	20	118
GO:0050660	flavin adenine dinucleotide binding	F	0.0173097	0.000119754	11	43
GO:0004300	enoyl-CoA hydratase activity	F	0.0314169	0.000260603	4	3
Muscles
GO:0036379	myofilament	C	7.93518e-05	1.35938e-07	7	3
GO:0043292	contractile fiber	C	9.24776e-05	1.751e-07	13	29
GO:0044449	contractile fiber part	C	0.000240934	5.64808e-07	12	27
GO:0005859	muscle myosin complex	C	0.000246842	6.2317e-07	6	2
GO:0030016	myofibril	C	0.00139003	4.38652e-06	11	28
GO:0030017	sarcomere	C	0.0037031	1.39729e-05	10	26
GO:0016460	myosin II complex	C	0.00713371	3.02303e-05	6	7
GO:0032982	myosin filament	C	0.0173097	0.000116683	4	2
GO:0005863	striated muscle myosin thick filament	C	0.0173097	0.000116683	4	2
GO:0042692	muscle cell differentiation	P	0.0267405	0.000212169	16	92
GO:0030239	myofibril assembly	P	0.0323962	0.00027432	9	32
Mitochondria
GO:0005759	mitochondrial matrix	C	1.16143e-06	1.04718e-09	25	88
GO:0005739	mitochondrion	C	7.39854e-06	8.00491e-09	66	525
GO:0005740	mitochondrial envelope	C	0.00202218	6.56373e-06	26	159
GO:0031966	mitochondrial membrane	C	0.00311254	1.12255e-05	24	144
GO:0005743	mitochondrial inner membrane	C	0.00685552	2.84333e-05	20	113
Lipid metabolism
GO:0016042	lipid catabolic process	P	0.00970456	5.68746e-05	11	39
GO:0009062	fatty acid catabolic process	P	0.0257052	0.000201636	7	17
Cell surface interaction
GO:0019932	second-messenger-mediated signaling	P	0.0491651	0.000447722	8	27

## Sheet: Permissive Up
GO terms upregulated only in inf+/+ cardia phenotype
GO ID	Go term	Category	FDR corrected p-value	P-value	#Genes DE	#Genes non-DE
Cell surface interaction
GO:0007155	cell adhesion	P	0.00646139	8.15611e-06	35	198
GO:0022610	biological adhesion	P	0.00664164	8.98247e-06	35	199
GO:0071944	cell periphery	C	0.0492946	0.000106669	80	696
Cell structure
GO:0006026	aminoglycan catabolic process	P	0.034681	6.32814e-05	8	14
GO:0060541	respiratory system development	P	0.034681	6.43844e-05	29	167
GO:0005652	nuclear lamina	C	0.034681	6.57782e-05	6	6
Peptidase
GO:0004175	endopeptidase activity	F	0.0184789	2.8324e-05	38	239
GO:0004867	serine-type endopeptidase inhibitor activity	F	0.0353226	7.32505e-05	7	10

## Sheet: Permissive Down
GO terms downregulated only in inf+/+ cardia phenotype
GO ID	Go term	Category	FDR corrected p-value	P-value	#Genes DE	#Genes non-DE
Membrane
GO:0031224	intrinsic component of membrane	C	8.30381e-06	7.48699e-10	81	792
GO:0016021	integral component of membrane	C	5.77734e-05	1.04181e-08	77	782
GO:0016020	membrane	C	0.000712295	3.85337e-07	143	1972
GO:0044425	membrane part	C	0.00148418	1.33818e-06	94	1163
Carbohydrates metabolism
GO:0005975	carbohydrate metabolic process	P	0.00147328	1.19552e-06	37	302
GO:0044723	single-organism carbohydrate metabolic process	P	0.00370772	5.01449e-06	29	220
GO:1901135	carbohydrate derivative metabolic process	P	0.00896431	1.69733e-05	42	413
Transport
GO:0022857	transmembrane transporter activity	F	0.000537682	1.93917e-07	49	434
GO:0005215	transporter activity	F	0.000712295	3.59237e-07	56	542
GO:0022891	substrate-specific transmembrane transporter activity	F	0.00681781	1.10649e-05	40	377
GO:0022892	substrate-specific transporter activity	F	0.0089232	1.60909e-05	42	412
GO:0022804	active transmembrane transporter activity	F	0.0139337	2.88951e-05	20	133
GO:0015075	ion transmembrane transporter activity	F	0.0198086	4.28641e-05	36	345
GO:0015711	organic anion transport	P	0.045446	0.000114732	12	60
Translation
GO:0010998	regulation of translational initiation by eIF2 alpha phosphorylation	P	0.0421113	0.000102516	3	0

## Sheet: Shared Up
GO terms upregulated in both inf+/- and inf+/+ cardia phenotype
GO ID	Go term	Category	FDR corrected p-value	P-value	#Genes DE	#Genes non-DE
Peptidase
GO:0004857	enzyme inhibitor activity	F	0.028	5.81e-05	12	44
GO:0004866	endopeptidase inhibitor activity	F	0.00212	1.15e-06	11	22
GO:0008233	peptidase activity	F	0.00279	1.76e-06	48	367
GO:0008237	metallopeptidase activity	F	0.0263	4.98e-05	19	102
GO:0030414	peptidase inhibitor activity	F	0.00129	5.21e-07	12	25
GO:0061134	peptidase regulator activity	F	0.00283	2.39e-06	12	30
GO:0061135	endopeptidase regulator activity	F	0.00283	3.05e-06	11	25
GO:0070011	peptidase activity, acting on L-amino acid peptides	F	0.00283	2.99e-06	46	352
Extracellular region
GO:0005576	extracellular region	C	1.72e-07	1.55e-11	51	271
GO:0005615	extracellular space	C	0.00313	3.96e-06	17	67
GO:0044421	extracellular region part	C	0.0153	2.35e-05	23	133
Membrane
GO:0016020	membrane	C	0.00432	5.84e-06	163	1952
GO:0016021	integral component of membrane	C	0.0179	3.06e-05	77	782
GO:0031224	intrinsic component of membrane	C	0.0179	3.02e-05	78	795
GO:0044425	membrane part	C	0.00313	3.9e-06	108	1149
Immune response
GO:0009617	response to bacterium	P	0.00283	3.06e-06	16	58

## Sheet: Shared Down
GO terms downregulated in both inf+/- and inf+/+ cardia phenotype
GO ID	Go term	Category	FDR corrected p-value	P-value	#Genes DE	#Genes non-DE
Iron metabolism
GO:0005506	iron ion binding	F	0.000191	4.13e-07	20	82
GO:0020037	heme binding	F	0.00106	2.87e-06	19	86
GO:0046906	tetrapyrrole binding	F	0.00119	3.33e-06	19	87
Oxidation-Reduction
GO:0016491	oxidoreductase activity	F	4.46e-06	4.43e-09	63	481
GO:0016614	oxidoreductase activity, acting on CH-OH group of donors	F	0.0173	0.000111	15	77
GO:0016705	oxidoreductase activity, acting on paired donors, with incorporation or reduction of molecular oxygen	F	0.000241	5.45e-07	21	92
GO:0055114	oxidation-reduction process	P	3.94e-08	7.1e-12	63	404
Lipid metabolism
GO:0006629	lipid metabolic process	P	0.00729	3.42e-05	39	327
Metabolism
GO:0044281	small molecule metabolic process	P	6.07e-11	5.47e-15	101	750
GO:0044710	single-organism metabolic process	P	4.96e-05	7.16e-08	150	1732
GO:0003824	catalytic activity	F	0.00912	4.98e-05	229	3246
Transport
GO:0055085	transmembrane transport	P	0.0096	5.54e-05	39	335
Mitochondria
GO:0044429	mitochondrial part	C	5.9e-08	1.6e-11	46	240
